# Supplementary material for: Assessment of Racial Disparities in the Risks of Septic and Aseptic Revision Total Knee Replacements
Source: PubMed Central journal article supplement (PMC8295735; doi:10.1001/jamanetworkopen.2021.17581), 2021-07-21
Supplement: jamanetwopen-e2117581-s001.pdf [file jamanetwopen-e2117581-s001.pdf]

## Supplementary Online Content

Bass AR, Do HT, Mehta B, et al. Assessment of racial disparities in the risks of septic and aseptic revision total knee replacements. *JAMA Netw Open*. 2021;4(7):e2117581. doi:10.1001/jamanetworkopen.2021.17581

**eTable 1.** Procedure Codes Used to Identify Revision TKR

**eTable 2.** Reasons for Revision TKR: *ICD-9-CM* Codes

**eTable 3.** Comorbidities, Indication for TKR, Complications Index TKR: *ICD-9-CM* Codes

**eTable 4.** Cox Multivariable Proportional Hazards Regression Modeling of Septic and Aseptic Revision TKR Risk in Black Patients Only

**eTable 5.** Cox Multivariable Proportional Hazards Regression Modeling of Septic and Aseptic Revision TKR Risk in White Patients Only

**eTable 6.** Marginal Cox Proportional Hazards Regression Model, Cox Proportional Hazards Regression Model Stratified by State, and Cox Proportional Hazards Regression Model With a Frailty Term for Risk of Aseptic Revision TKR

**eTable 7.** Marginal Cox Proportional Hazards Regression Model, Cox Proportional Hazards Regression Model Stratified by State, and Cox Proportional Hazards Regression Model With a Frailty Term for Risk of Septic Revision TKR

**eFigure.** Flow Diagram Showing Patients Included and Excluded From the Study

This supplementary material has been provided by the authors to give readers additional information about their work.

**eTable 1. Procedure Codes Used to Identify Revision TKR**

| <b>Procedure Codes –used to identify TKR revision</b>     |                       |
|-----------------------------------------------------------|-----------------------|
| <b>Variable</b>                                           | <b>Procedure code</b> |
| Revision of knee replacement, total (all components)      | 00.80                 |
|                                                           |                       |
| Revision of knee replacement, tibial component            |                       |
| Replacement of tibial baseplate and tibial insert (liner) | 00.81                 |
| Revision of knee replacement, femoral component           | 00.82                 |
| Revision of knee replacement, patellar component          | 00.83                 |
| Revision of total knee replacement, tibial insert         | 00.84                 |
| Revision of knee replacement, not otherwise specified     | 81.55                 |
| Removal of knee prosthesis without replacement            | 80.06                 |

**eTable 2. Reasons for Revision TKR: ICD-9-CM Codes**

| Reasons for revision | Diagnosis                                                                                  | ICD-9 codes                                |
|----------------------|--------------------------------------------------------------------------------------------|--------------------------------------------|
| Mechanical/Aseptic   | Osteoarthritis                                                                             | 715.X0; 715.X5; 715.X6; 715.X8;            |
| Mechanical/Aseptic   | Pathological dislocation                                                                   | 718.20; 718.25; 718.26; 718.28; 718.29     |
| Mechanical/Aseptic   | Recurrent dislocation of joint                                                             | 718.30; 718.35; 718.36; 718.38; 718.39     |
| Mechanical/Aseptic   | Contracture of joint                                                                       | 718.40; 718.45; 718.46; 718.48; 718.49;    |
| Mechanical/Aseptic   | Ankylosis of joint                                                                         | 718.50; 718.55; 718.56; 718.58; 718.59     |
| Mechanical/Aseptic   | Other joint derangement not elsewhere classified                                           | 718.90; 718.95; 718.96; 718.98; 718.99     |
| Mechanical/Aseptic   | Other and unspecified disorders of bone and cartilage                                      | 733.90; 733.99                             |
| Mechanical/Aseptic   | Other acquired deformities of knee                                                         | 736.6                                      |
| Mechanical/Aseptic   | Mechanical complication of internal orthopedic device implant and graft                    | 996.40-996.43; 996.45-996.49               |
| Mechanical/Aseptic   | Mechanical complication due to other implant and internal device, not elsewhere classified | 996.59                                     |
| Mechanical/Aseptic   | Other complications due to internal prosthetic device, implant, and graft                  | 996.70; 996.77; 996.78; 996.79             |
|                      |                                                                                            |                                            |
| Septic               | Pyogenic arthritis<br>Unspecified infective arthritis<br>Osteomyelitis                     | 711.OX<br>711.9X<br>730.OX, 730.1X, 730.2X |
| Septic               | Infection and inflammatory reaction due to internal prosthetic device implant and graft    | 996.60; 996.66; 996.67; 996.69             |
| Septic               | Infected postoperative seroma                                                              | 998.51                                     |
| Septic               | Other postoperative infection                                                              | 998.59                                     |
|                      |                                                                                            |                                            |
| Fracture             | Pathologic fracture                                                                        | 733.10; 733.14-733.19;                     |
| Fracture             | Malunion and nonunion of fracture                                                          | 733.8X;                                    |
| Fracture             | Other and unspecified disorders of bone and cartilage – stress fracture                    | 733.93; 733.96-733.98                      |
| Fracture             | Fracture of other and unspecified parts of femur                                           | 821.X                                      |
| Fracture             | Fracture of patella                                                                        | 822.X                                      |
| Fracture             | Fracture of tibia and fibula                                                               | 823.X                                      |
| Fracture             | Other multiple and ill-defined fractures of lower limb                                     | 827.X                                      |
|                      |                                                                                            |                                            |

| Reasons for revision | Diagnosis                                                                         | ICD-9 codes   |
|----------------------|-----------------------------------------------------------------------------------|---------------|
| Other                | Disruption of operation wound                                                     | 998.3X        |
| Other                | Foreign body accidentally left during a procedure                                 | 998.4         |
| Other                | Persistent postoperative fistula                                                  | 998.6         |
| Other                | Acute reaction to foreign substance accidentally left during a procedure          | 998.7         |
| Other                | Non-healing surgical wound                                                        | 998.83        |
| Other                | Unspecified complication of procedure, not elsewhere classified                   | 998.89; 998.9 |
| Other                | Revisions lacking any specific codes for infection, mechanical causes or fracture |               |

ICD-9-CM = International Classification of Diseases, 9<sup>th</sup> Revision, Clinical Modification.

X = Indicates that the variable includes all codes starting with the numbers preceding the "X".

**eTable 3. Comorbidities, Indication for TKR, Complications Index TKR: ICD-9-CM Codes**

| Comorbidities | Diagnosis                             | ICD-9 codes                     |
|---------------|---------------------------------------|---------------------------------|
| Diabetes      | Diabetes                              | 250.X                           |
| Obesity       | Obesity                               | 278.0X                          |
| Renal disease | Renal disease                         | 403.X; 581.X-583.X; 585.X-587.X |
| COPD          | Chronic obstructive pulmonary disease | 491.2X, 492.X                   |

| Indication for index TKR | Diagnosis            | ICD-9 codes                     |
|--------------------------|----------------------|---------------------------------|
| Osteoarthritis           | Osteoarthrosis       | 715.X0; 715.X5; 715.X6; 715.X8; |
| Osteonecrosis            | Osteonecrosis        | 733.4X                          |
| Inflammatory arthritis   | Rheumatoid arthritis | 714.0                           |
|                          | Psoriatic arthritis  | 696.0                           |
|                          | Spondyloarthropathy  | 720.X; 099.3                    |

| Surgical complications index surgery | Diagnosis                                                                                                                   | ICD-9 codes  |
|--------------------------------------|-----------------------------------------------------------------------------------------------------------------------------|--------------|
| Surgical complications               |                                                                                                                             |              |
|                                      | Hemorrhage or hematoma complicating a procedure not elsewhere classified                                                    | 998.1X       |
|                                      | Disruption of operation wound                                                                                               | 998.3X       |
|                                      | Foreign body accidentally left during a procedure, Acute reaction to foreign substance accidentally left during a procedure | 998.4; 998.7 |

| Medical complications index surgery | Diagnosis                                                                      | ICD-9 codes                                  |
|-------------------------------------|--------------------------------------------------------------------------------|----------------------------------------------|
| Infection index surgery             |                                                                                |                                              |
|                                     | Other infection due to medical care not elsewhere classified                   | 999.3                                        |
|                                     | Pneumonia                                                                      | 480-486; 997.3X; 510.X                       |
|                                     | Skin infection                                                                 | 035; 680-682; 684; 686.8; 686.9              |
|                                     | Bacterial infection in conditions classified elsewhere and of unspecified site | 041.X                                        |
|                                     | Urinary tract infection, kidney infection                                      | 590.X; 597.X; 599.1; 599.9;                  |
|                                     | Bacteremia/Sepsis                                                              | 038.X; 790.7; 995.90; 995.91; 995.92; 998.02 |
|                                     | Upper respiratory tract infection                                              | 460-466; 471-476; 034.X                      |
|                                     | Gastroenteritis                                                                | 005.X; 008.X; 009.X;                         |
|                                     | Postoperative infection not elsewhere classified                               | 998.5X                                       |
|                                     | Diverticulitis, peritonitis                                                    | 562.11; 567.X                                |

eFigure. Flow Diagram Showing Patients Included and Excluded From the Study

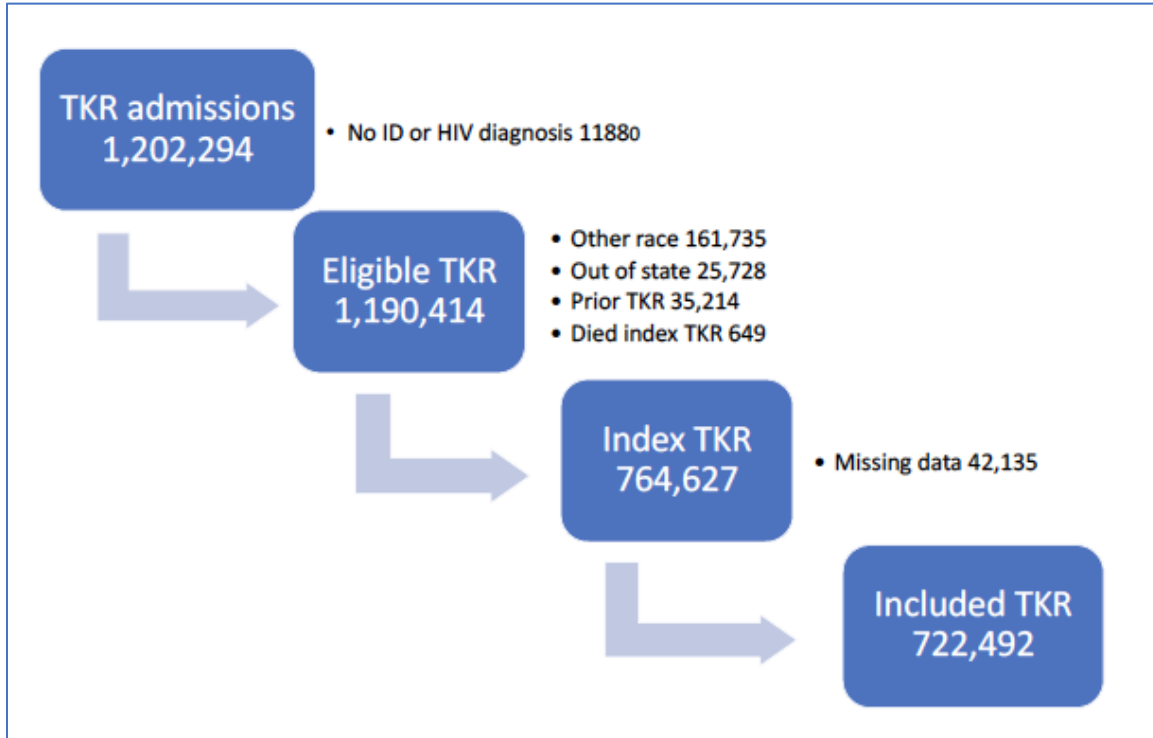

**eTable 4. Cox Multivariable Proportional Hazards Regression Modeling of Septic and Aseptic Revision TKR Risk in Black Patients Only**

| Variable                                           | Aseptic |             |         | Septic |             |         |
|----------------------------------------------------|---------|-------------|---------|--------|-------------|---------|
|                                                    | HR      | CI          | P value | HR     | CI          | P value |
| Age (5yrs)                                         | 0.795   | (0.78-0.81) | <.0001  | 0.824  | (0.80-0.85) | <.0001  |
| Sex - male                                         | 0.977   | (0.89-1.08) | 0.6296  | 1.635  | (1.43-1.87) | <.0001  |
| <b>Insurance</b>                                   |         |             |         |        |             |         |
| Medicaid                                           | 0.997   | (0.85-1.18) | 0.9743  | 0.909  | (0.72-1.14) | 0.4141  |
| Other                                              | 0.830   | (0.65-1.07) | 0.1454  | 0.585  | (0.40-0.86) | 0.0071  |
| Private                                            | 0.977   | (0.88-1.09) | 0.6717  | 0.676  | (0.57-0.80) | <.0001  |
| Workers compensation                               | 1.487   | (1.27-1.74) | <.0001  | 0.779  | (0.59-1.03) | 0.0797  |
| <b>Comorbidities</b>                               |         |             |         |        |             |         |
| Diabetes                                           | 1.057   | (0.96-1.17) | 0.2693  | 1.150  | (1.00-1.33) | 0.0555  |
| Obesity                                            | 0.895   | (0.81-0.99) | 0.0254  | 1.036  | (0.90-1.20) | 0.6364  |
| Renal disease                                      | 0.689   | (0.54-0.88) | 0.0032  | 1.393  | (1.09-1.78) | 0.0086  |
| COPD                                               | 1.086   | (0.92-1.28) | 0.3177  | 1.206  | (0.97-1.50) | 0.0883  |
| Inflammatory arthritis*                            | 0.626   | (0.49-0.80) | 0.0002  | 1.259  | (0.95-1.66) | 0.1038  |
| <b>Index TKR surgery</b>                           |         |             |         |        |             |         |
| Surgical Complication**                            | 1.333   | (0.95-1.86) | 0.0919  | 1.750  | (1.15-2.67) | 0.0096  |
| <b>Census tract variables</b>                      |         |             |         |        |             |         |
| CT % no college                                    | 0.822   | (0.57-1.18) | 0.2846  | 0.706  | (0.41-1.21) | 0.2057  |
| CT % poverty                                       | 0.969   | (0.87-1.08) | 0.5647  | 1.055  | (0.90-1.24) | 0.5178  |
| <b>Hospital annual TKR volume (reference 645+)</b> |         |             |         |        |             |         |
| 236-644                                            | 0.851   | (0.75-0.97) | 0.0143  | 1.119  | (0.89-1.40) | 0.3265  |
| 90-235                                             | 0.859   | (0.75-0.99) | 0.0306  | 1.349  | (1.07-1.70) | 0.0113  |
| <=89                                               | 0.873   | (0.74-1.03) | 0.1001  | 1.754  | (1.36-2.26) | <.0001  |
| <b>Hospital bed size</b>                           |         |             |         |        |             |         |
| 200-399 beds                                       | 0.961   | (0.86-1.07) | 0.4636  | 1.110  | (0.95-1.30) | 0.2016  |
| 6-199 beds                                         | 1.066   | (0.94-1.21) | 0.3213  | 1.080  | (0.88-1.32) | 0.4514  |
| <b>Hospital type</b>                               |         |             |         |        |             |         |
| Government, non-federal                            | 0.901   | (0.78-1.05) | 0.1720  | 1.142  | (0.93-1.40) | 0.1943  |
| Investor-owned (for-profit)                        | 1.003   | (0.87-1.15) | 0.9678  | 1.081  | (0.88-1.34) | 0.4691  |
| Rural                                              | 1.144   | (0.78-1.69) | 0.4978  | 1.167  | (0.65-2.10) | 0.6053  |
| Teaching hospital                                  | 0.902   | (0.81-1.00) | 0.0499  | 1.242  | (1.06-1.46) | 0.0077  |
| <b>State</b>                                       |         |             |         |        |             |         |
| California                                         | 1.265   | (1.13-1.42) | <.0001  | 1.256  | (1.06-1.49) | 0.0080  |
| Florida                                            | 1.062   | (0.94-1.20) | 0.3310  | 0.951  | (0.79-1.14) | 0.5936  |
| Year                                               | 1.020   | (1.00-1.04) | 0.0242  | 1.009  | (0.98-1.03) | 0.4863  |

\*Rheumatoid arthritis, psoriatic arthritis, spondyloarthropathy

\*\*Hemorrhage, wound disruption, retained foreign body

TKR = Total Knee Replacement

**eTable 5. Cox Multivariable Proportional Hazards Regression Modeling of Septic and Aseptic Revision TKR Risk in White Patients Only**

| Variable                                           | Aseptic |             |         | Septic |             |         |
|----------------------------------------------------|---------|-------------|---------|--------|-------------|---------|
|                                                    | HR      | CI          | P value | HR     | CI          | P value |
| Age (5yrs)                                         | 0.779   | (0.77-0.79) | <.0001  | 0.849  | (0.84-0.86) | <.0001  |
| Sex- male                                          | 1.041   | (1.01-1.08) | 0.0177  | 1.609  | (1.54-1.68) | <.0001  |
| <b>Insurance</b>                                   |         |             |         |        |             |         |
| Medicaid                                           | 0.937   | (0.84-1.05) | 0.2458  | 1.255  | (1.10-1.44) | 0.0011  |
| Other                                              | 0.942   | (0.85-1.05) | 0.2821  | 0.997  | (0.86-1.16) | 0.9712  |
| Private                                            | 0.899   | (0.86-0.94) | <.0001  | 0.773  | (0.73-0.82) | <.0001  |
| Workers compensation                               | 1.624   | (1.51-1.74) | <.0001  | 0.978  | (0.87-1.10) | 0.7040  |
| <b>Comorbidities</b>                               |         |             |         |        |             |         |
| Diabetes                                           | 1.017   | (0.97-1.06) | 0.4401  | 1.247  | (1.18-1.32) | <.0001  |
| Obesity                                            | 0.785   | (0.75-0.82) | <.0001  | 1.147  | (1.08-1.21) | <.0001  |
| Renal disease                                      | 0.897   | (0.80-1.00) | 0.0578  | 1.426  | (1.28-1.59) | <.0001  |
| COPD                                               | 1.040   | (0.99-1.10) | 0.1525  | 1.221  | (1.15-1.30) | <.0001  |
| Inflammatory arthritis                             | 0.789   | (0.71-0.87) | <.0001  | 1.574  | (1.42-1.75) | <.0001  |
| <b>Index TKR surgery</b>                           |         |             |         |        |             |         |
| Surgical complication                              | 1.112   | (0.93-1.32) | 0.2313  | 2.277  | (1.92-2.69) | <.0001  |
| <b>Census tracts</b>                               |         |             |         |        |             |         |
| CT % no college                                    | 0.901   | (0.80-1.02) | 0.1004  | 1.186  | (1.00-1.41) | 0.0543  |
| CT % poverty                                       | 0.998   | (0.94-1.06) | 0.9551  | 1.021  | (0.94-1.11) | 0.6277  |
| <b>Hospital annual TKR volume (reference 645+)</b> |         |             |         |        |             |         |
| 236-644                                            | 1.052   | (1.00-1.10) | 0.0354  | 1.138  | (1.06-1.22) | 0.0002  |
| 90-235                                             | 1.079   | (1.02-1.14) | 0.0041  | 1.324  | (1.23-1.42) | <.0001  |
| <=89                                               | 1.204   | (1.13-1.29) | <.0001  | 1.498  | (1.36-1.65) | <.0001  |
| <b>Hospital bed size</b>                           |         |             |         |        |             |         |
| 200-399                                            | 1.048   | (1.00-1.09) | 0.0389  | 0.973  | (0.92-1.03) | 0.3799  |
| 6-199                                              | 1.020   | (0.97-1.07) | 0.4333  | 0.997  | (0.93-1.07) | 0.9320  |
| <b>Hospital type</b>                               |         |             |         |        |             |         |
| Government, non-federal                            | 1.060   | (1.00-1.12) | 0.0348  | 1.067  | (0.99-1.15) | 0.0955  |
| Investor-owned (for-profit)                        | 1.118   | (1.07-1.17) | <.0001  | 1.125  | (1.05-1.20) | 0.0006  |
| rural                                              | 0.969   | (0.90-1.04) | 0.4070  | 0.854  | (0.77-0.95) | 0.0042  |
| Teaching hospital                                  | 0.944   | (0.91-0.98) | 0.0050  | 1.125  | (1.06-1.19) | <.0001  |
| <b>State</b>                                       |         |             |         |        |             |         |
| California                                         | 1.103   | (1.06-1.15) | <.0001  | 1.152  | (1.08-1.22) | <.0001  |
| Florida                                            | 1.058   | (1.01-1.11) | 0.0209  | 0.915  | (0.86-0.98) | 0.0087  |
| Year                                               | 1.021   | (1.01-1.03) | <.0001  | 1.028  | (1.02-1.04) | <.0001  |

\*Rheumatoid arthritis, psoriatic arthritis, spondyloarthropathy

\*\*Hemorrhage, wound disruption, retained foreign body

TKR = Total Knee Replacement



**eTable 6. Marginal Cox Proportional Hazards Regression Model, Cox Proportional Hazards Regression Model Stratified by State, and Cox Proportional Hazards Regression Model With a Frailty Term for Risk of Aseptic Revision TKR**

| Variable                          | Marginal Cox Model |             |         | Stratified by State |             |         | Frailty Model |             |         |
|-----------------------------------|--------------------|-------------|---------|---------------------|-------------|---------|---------------|-------------|---------|
|                                   | HR                 | CI          | P value | HR                  | CI          | P value | HR            | CI          | P value |
| Age (5yrs)                        | 0.782              | (0.77-0.79) | <.0001  | 0.782               | (0.77-0.79) | <.0001  | 0.782         | (0.77-0.79) | <.0001  |
| Race-Black                        | 1.387              | (1.36-1.41) | <.0001  | 1.391               | (1.32-1.46) | <.0001  | 1.391         | (1.32-1.46) | <.0001  |
| Sex - Male                        | 1.034              | (1.02-1.05) | <.0001  | 1.032               | (1.00-1.06) | 0.0455  | 1.032         | (1.00-1.06) | 0.0444  |
| <b>Insurance</b>                  |                    |             |         |                     |             |         |               |             |         |
| Medicaid                          | 0.943              | (0.89-1.00) | 0.0503  | 0.941               | (0.86-1.03) | 0.1860  | 0.939         | (0.86-1.03) | 0.1691  |
| Other                             | 0.913              | (0.82-1.02) | 0.1006  | 0.917               | (0.83-1.01) | 0.0873  | 0.917         | (0.83-1.01) | 0.0885  |
| Private                           | 0.914              | (0.88-0.95) | <.0001  | 0.913               | (0.88-0.95) | <.0001  | 0.913         | (0.88-0.95) | <.0001  |
| Workers Compensation              | 1.629              | (1.57-1.69) | <.0001  | 1.614               | (1.51-1.72) | <.0001  | 1.610         | (1.51-1.72) | <.0001  |
| <b>Comorbidities</b>              |                    |             |         |                     |             |         |               |             |         |
| Diabetes                          | 1.021              | (0.96-1.08) | 0.4981  | 1.024               | (0.98-1.07) | 0.2428  | 1.024         | (0.98-1.07) | 0.2410  |
| Obesity                           | 0.809              | (0.79-0.83) | <.0001  | 0.806               | (0.77-0.84) | <.0001  | 0.805         | (0.77-0.84) | <.0001  |
| Renal disease                     | 0.859              | (0.80-0.92) | <.0001  | 0.854               | (0.77-0.95) | 0.0025  | 0.855         | (0.77-0.95) | 0.0027  |
| COPD                              | 1.039              | (1.00-1.08) | 0.0580  | 1.045               | (0.99-1.10) | 0.0850  | 1.045         | (0.99-1.10) | 0.0884  |
| Inflammatory arthritis*           | 0.762              | (0.64-0.90) | 0.0017  | 0.763               | (0.70-0.84) | <.0001  | 0.763         | (0.70-0.84) | <.0001  |
| <b>Index TKR</b>                  |                    |             |         |                     |             |         |               |             |         |
| Surgical Complication**           | 1.157              | (1.05-1.28) | 0.0048  | 1.152               | (0.99-1.34) | 0.0717  | 1.152         | (0.99-1.34) | 0.0722  |
| <b>Census tracts</b>              |                    |             |         |                     |             |         |               |             |         |
| % no college                      | 0.822              | (0.69-0.98) | 0.0272  | 0.910               | (0.81-1.02) | 0.1130  | 0.904         | (0.80-1.02) | 0.0893  |
| % below poverty                   | 1.007              | (0.93-1.09) | 0.8574  | 0.981               | (0.93-1.03) | 0.4787  | 0.982         | (0.93-1.04) | 0.5083  |
| <b>Hospital annual TKR volume</b> |                    |             |         |                     |             |         |               |             |         |
| 236 to 644                        | 1.043              | (0.88-1.24) | 0.6326  | 1.025               | (0.98-1.07) | 0.2746  | 1.028         | (0.98-1.07) | 0.2168  |
| 90 to 235                         | 1.057              | (0.83-1.34) | 0.6439  | 1.046               | (1.00-1.10) | 0.0697  | 1.049         | (1.00-1.10) | 0.0538  |
| <=89                              | 1.153              | (0.89-1.50) | 0.2869  | 1.140               | (1.07-1.21) | <.0001  | 1.143         | (1.07-1.22) | <.0001  |
| <b>Hospital bed size</b>          |                    |             |         |                     |             |         |               |             |         |
| 200-399                           | 1.055              | (0.94-1.19) | 0.3657  | 1.038               | (1.00-1.08) | 0.0755  | 1.039         | (1.00-1.08) | 0.0623  |
| 6-199                             | 1.049              | (0.92-1.20) | 0.4792  | 1.028               | (0.98-1.08) | 0.2413  | 1.030         | (0.98-1.08) | 0.2135  |
| <b>Hospital Type</b>              |                    |             |         |                     |             |         |               |             |         |
| Government, non-federal           | 1.035              | (0.94-1.14) | 0.4705  | 1.032               | (0.98-1.09) | 0.2270  | 1.034         | (0.98-1.09) | 0.1977  |
| Investor-owned (for-profit)       | 1.090              | (1.05-1.14) | <.0001  | 1.101               | (1.05-1.15) | <.0001  | 1.102         | (1.05-1.15) | <.0001  |
| Rural                             | 0.968              | (0.93-1.01) | 0.1648  | 0.975               | (0.91-1.05) | 0.4996  | 0.975         | (0.91-1.05) | 0.4931  |
| Teaching hospital                 | 0.932              | (0.89-0.98) | 0.0033  | 0.938               | (0.90-0.97) | 0.0008  | 0.938         | (0.90-0.97) | 0.0008  |
| Calendar year                     | 1.021              | (0.99-1.05) | 0.1341  | 1.021               | (1.01-1.03) | <.0001  | 1.021         | (1.01-1.03) | <.0001  |

\*Rheumatoid arthritis, psoriatic arthritis, spondyloarthropathy; \*\*Hemorrhage, wound disruption, retained foreign body  
TKR = Total Knee Replacement

**eTable 7. Marginal Cox Proportional Hazards Regression Model, Cox Proportional Hazards Regression Model Stratified by State, and Cox Proportional Hazards Regression Model With a Frailty Term for Risk of Septic Revision TKR**

| Variable                          | Marginal Cox Model |             |         | Stratified by State |             |         | Frailty |             |         |
|-----------------------------------|--------------------|-------------|---------|---------------------|-------------|---------|---------|-------------|---------|
|                                   | HR                 | CI          | P value | HR                  | CI          | P value | HR      | CI          | P value |
| Age (5yrs)                        | 0.845              | (0.83-0.86) | <.0001  | 0.845               | (0.83-0.86) | <.0001  | 0.845   | (0.83-0.86) | <.0001  |
| Race-Black                        | 1.105              | (1.05-1.17) | 0.0004  | 1.113               | (1.03-1.20) | 0.0041  | 1.113   | (1.03-1.20) | 0.0041  |
| Sex - Male                        | 1.619              | (1.53-1.71) | <.0001  | 1.614               | (1.55-1.68) | <.0001  | 1.613   | (1.55-1.68) | <.0001  |
| <b>Insurance</b>                  |                    |             |         |                     |             |         |         |             |         |
| Medicaid                          | 1.176              | (1.14-1.22) | <.0001  | 1.168               | (1.04-1.31) | 0.0086  | 1.167   | (1.04-1.31) | 0.0090  |
| Other                             | 0.920              | (0.88-0.97) | 0.0009  | 0.929               | (0.81-1.07) | 0.2974  | 0.929   | (0.81-1.07) | 0.2985  |
| Private                           | 0.761              | (0.69-0.84) | <.0001  | 0.759               | (0.72-0.80) | <.0001  | 0.758   | (0.72-0.80) | <.0001  |
| Workers Compensation              | 0.972              | (0.89-1.07) | 0.5484  | 0.950               | (0.85-1.06) | 0.3495  | 0.950   | (0.85-1.06) | 0.3416  |
| <b>Comorbidities</b>              |                    |             |         |                     |             |         |         |             |         |
| Diabetes                          | 1.227              | (1.20-1.25) | <.0001  | 1.235               | (1.17-1.30) | <.0001  | 1.236   | (1.17-1.30) | <.0001  |
| Obesity                           | 1.145              | (1.10-1.19) | <.0001  | 1.132               | (1.07-1.19) | <.0001  | 1.132   | (1.07-1.19) | <.0001  |
| Renal disease                     | 1.440              | (1.38-1.50) | <.0001  | 1.424               | (1.29-1.57) | <.0001  | 1.425   | (1.29-1.57) | <.0001  |
| COPD                              | 1.207              | (1.16-1.26) | <.0001  | 1.222               | (1.15-1.30) | <.0001  | 1.221   | (1.15-1.30) | <.0001  |
| Inflammatory arthritis*           | 1.526              | (1.38-1.69) | <.0001  | 1.531               | (1.39-1.69) | <.0001  | 1.530   | (1.39-1.69) | <.0001  |
| <b>Index TKR</b>                  |                    |             |         |                     |             |         |         |             |         |
| Surgical Complication**           | 2.212              | (1.89-2.60) | <.0001  | 2.191               | (1.87-2.56) | <.0001  | 2.191   | (1.87-2.56) | <.0001  |
| <b>Census tracts</b>              |                    |             |         |                     |             |         |         |             |         |
| % no college                      | 0.917              | (0.82-1.02) | 0.1072  | 1.145               | (0.97-1.35) | 0.1081  | 1.136   | (0.96-1.34) | 0.1297  |
| % below poverty                   | 1.074              | (1.04-1.10) | <.0001  | 1.012               | (0.94-1.09) | 0.7450  | 1.014   | (0.94-1.09) | 0.7025  |
| <b>Hospital annual TKR volume</b> |                    |             |         |                     |             |         |         |             |         |
| 236 to 644                        | 1.177              | (1.01-1.37) | 0.0351  | 1.132               | (1.06-1.21) | 0.0001  | 1.135   | (1.06-1.21) | 0.0001  |
| 90 to 235                         | 1.356              | (1.19-1.55) | <.0001  | 1.322               | (1.23-1.42) | <.0001  | 1.327   | (1.24-1.42) | <.0001  |
| <=89                              | 1.576              | (1.44-1.72) | <.0001  | 1.535               | (1.41-1.68) | <.0001  | 1.540   | (1.41-1.68) | <.0001  |
| <b>Hospital bed size</b>          |                    |             |         |                     |             |         |         |             |         |
| 200-399                           | 1.029              | (0.96-1.10) | 0.3949  | 0.990               | (0.94-1.05) | 0.7316  | 0.992   | (0.94-1.05) | 0.7849  |
| 6-199                             | 1.058              | (1.00-1.12) | 0.0688  | 1.009               | (0.94-1.08) | 0.7970  | 1.011   | (0.95-1.08) | 0.7488  |
| <b>Hospital Type</b>              |                    |             |         |                     |             |         |         |             |         |
| Government, non-federal           | 1.080              | (0.95-1.23) | 0.2421  | 1.076               | (1.00-1.15) | 0.0437  | 1.077   | (1.00-1.16) | 0.0407  |
| Investor-owned (for-profit)       | 1.093              | (1.03-1.16) | 0.0022  | 1.121               | (1.05-1.20) | 0.0005  | 1.120   | (1.05-1.19) | 0.0005  |
| Rural                             | 0.842              | (0.83-0.85) | <.0001  | 0.860               | (0.77-0.96) | 0.0052  | 0.859   | (0.77-0.96) | 0.0050  |
| Teaching hospital                 | 1.125              | (1.04-1.22) | 0.0046  | 1.138               | (1.08-1.20) | <.0001  | 1.140   | (1.08-1.20) | <.0001  |
| Calendar year                     | 1.025              | (1.00-1.05) | 0.0152  | 1.026               | (1.02-1.03) | <.0001  | 1.026   | (1.02-1.03) | <.0001  |

\*Rheumatoid arthritis, psoriatic arthritis, spondyloarthropathy; \*\*Hemorrhage, wound disruption, retained foreign body  
TKR = Total Knee Replacement
